# Supplementary material for: One-step synthesis of nickel cobalt sulphides particles: tuning the composition for high performance supercapacitors
Source: Royal Society of Chemistry journal article supplement (doi:10.1039/c6ra10048a), 2016-01-01
Supplement: c6ra10048a1.pdf [file c6ra10048a1.pdf]

## One-step synthesis of nickel cobalt sulphides particles: tuning the composition for high performance supercapacitors

Huaihao Zhang <sup>a,\*</sup>, Bing Guan, Jiangna Gu <sup>b</sup>, Yu Li, Chi Ma, Jing Zhao, Tianyi Wang and  
Changjing Cheng <sup>c,\*</sup>

<sup>a</sup> College of Chemistry and Chemical Engineering, Yangzhou University, Yangzhou 225002, PR China

<sup>b</sup> AnKao Energy Co., Ltd. No. 29, Huahong Street, East Suhong Road, SuZhou Industrial Park, SuZhou, 215026, PR China

<sup>c</sup> College of Chemistry & Environment Protection Engineering, Southwest University for Nationalities, Chengdu, 610041, China)

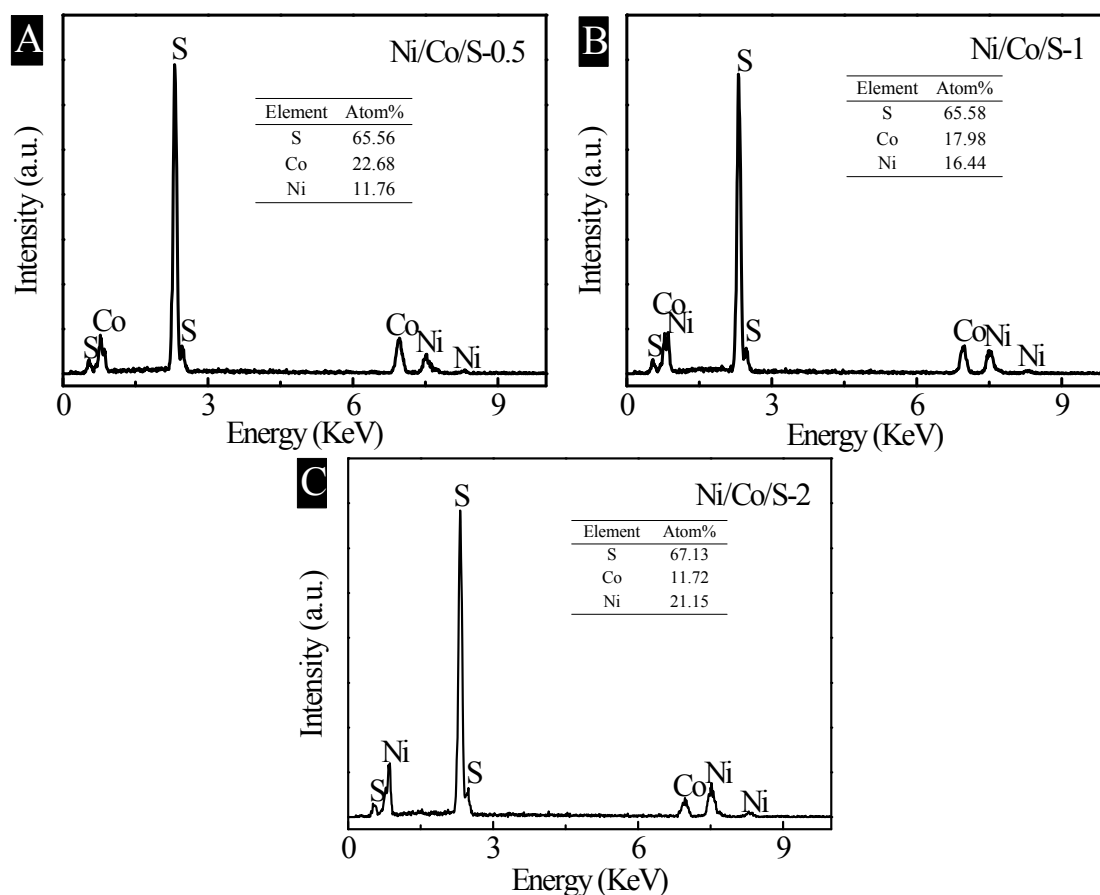

**Figure. S1** EDS spectrum of samples: (A) Ni/Co/S-0.5, (B) Ni/Co/S-1, (C) Ni/Co/S-2.

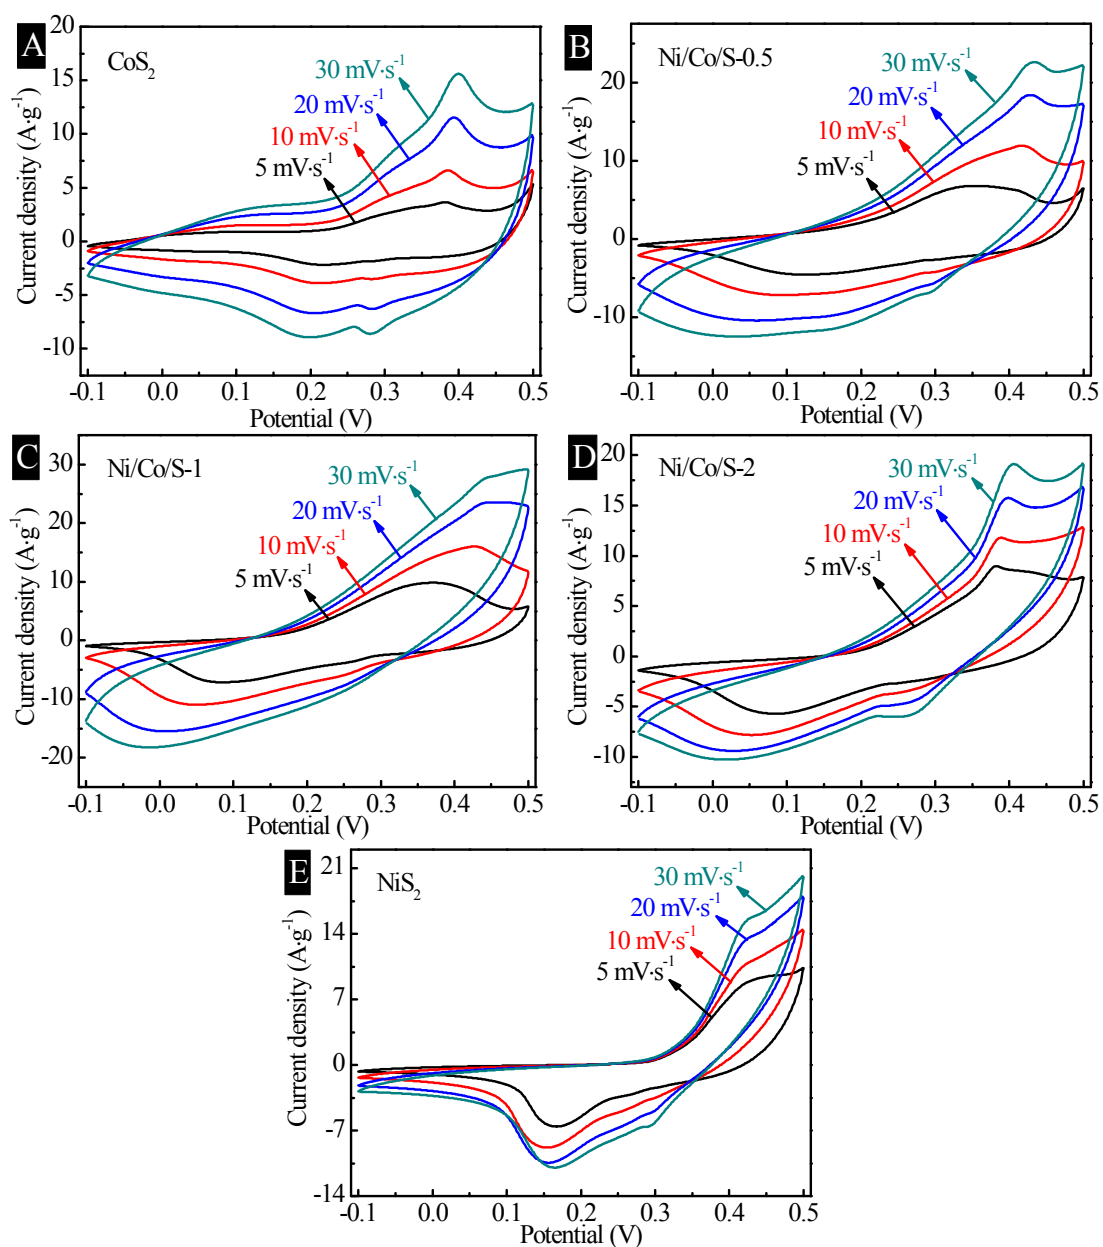

**Figure. S2** CV curves of the Ni-Co sulphides at different scan rates: (A) CoS<sub>2</sub>, (B) Ni/Co/S-0.5, (C) Ni/Co/S-1, (D) Ni/Co/S-2, (E) NiS<sub>2</sub>.

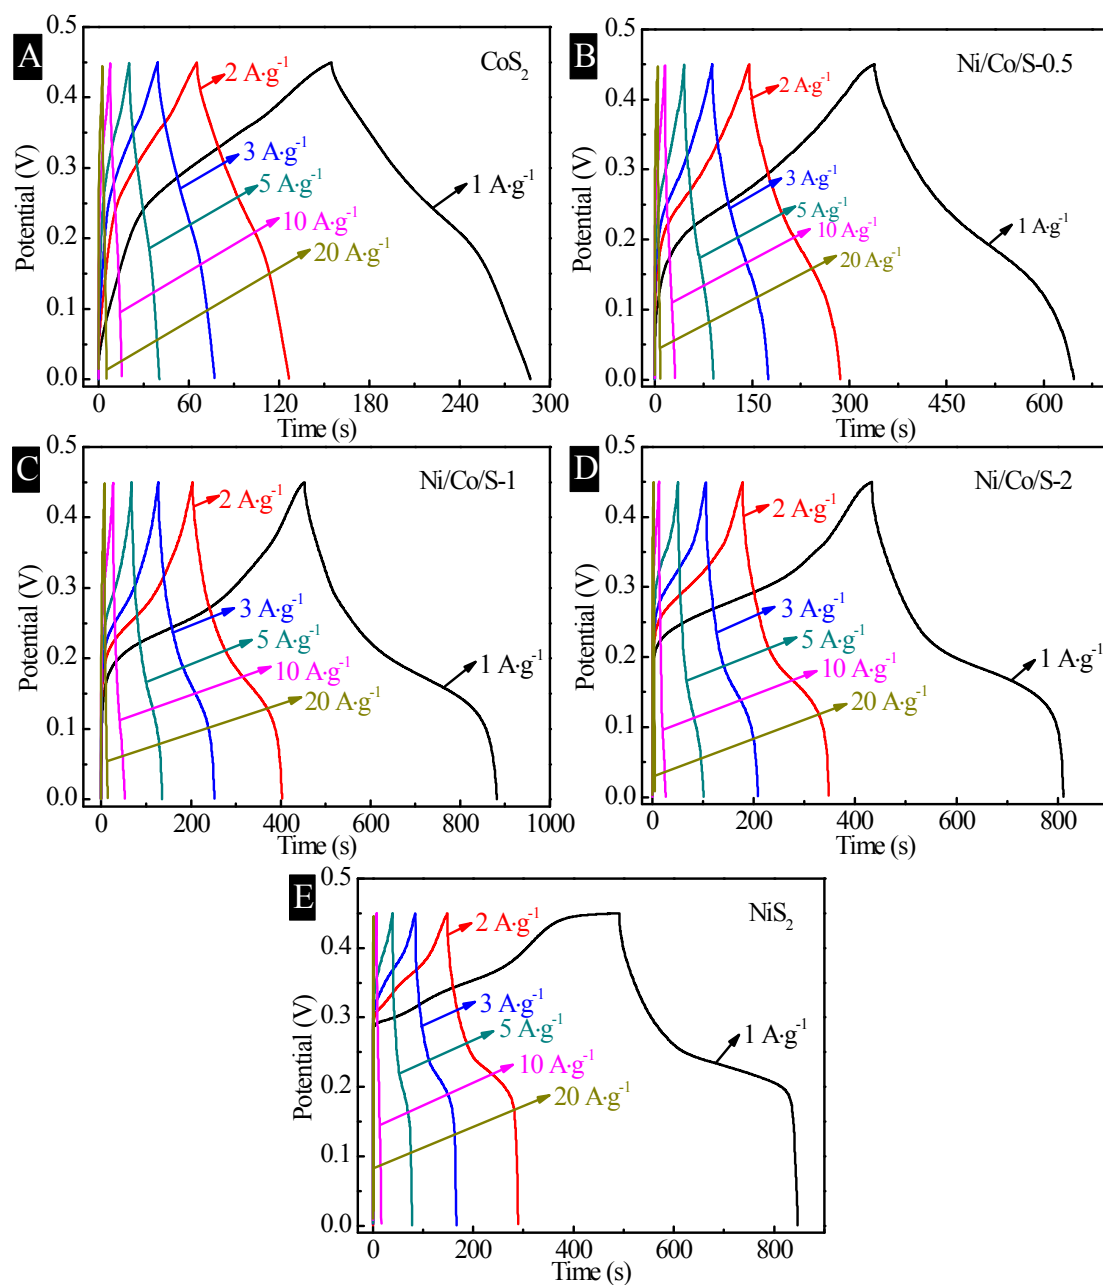

**Figure. S3** GCD curves of the Ni-Co sulphides at different current density: (A)  $\text{CoS}_2$ , (B) Ni/Co/S-0.5, (C) Ni/Co/S-1, (D) Ni/Co/S-2, (E)  $\text{NiS}_2$ .
